# Supplementary material
Source: PubMed Central journal article supplement (PMC4169012)
Supplement: epi-9-1207-s01.pdf [file epi-9-1207-s01.pdf]

## **Supplemental Material to:**

**Zachary J Waldrip, Stephanie D Byrum, Aaron J Storey, Jun Gao, Alicia K Byrd, Samuel G Mackintosh, Wayne P Wahls, Sean D Taverna, Kevin D Raney, Alan J Tackett**

**A CRISPR-based approach for proteomic analysis of a single genomic locus**

**Epigenetics 2014; 9(9)**

**<http://dx.doi.org/10.4161/epi.29919>**

**[http://www.landesbioscience.com/journals/epigenetics/  
article/29919/](http://www.landesbioscience.com/journals/epigenetics/article/29919/)**

Table S1. Proteins enriched with CRISPR-ChAP-MS analysis of GAL1 promoter chromatin in galactose-containing media enriched >2-fold (with at least 5 spectral counts) with Cas9-PrA/gRNA vs the no gRNA control are listed (86 proteins are categorized as those involved in transcription (11 proteins) and those that are common contaminants)

#### Identified Proteins (transcription)

REB1\_YEAST DNA-binding protein REB1 OS=*Saccharomyces cerevisiae* GN=REB1 PE=1 SV=2  
SPT5\_YEAST Transcription elongation factor SPT5 OS=*Saccharomyces cerevisiae* GN=SPT5 PE=1 SV=1  
TOA2\_YEAST Transcription initiation factor IIA small subunit OS=*Saccharomyces cerevisiae* GN=TOA2 PE=1 SV=1  
BAF1\_YEAST Transcription factor BAF1 OS=*Saccharomyces cerevisiae* GN=BAF1 PE=1 SV=3  
SIN3\_YEAST Transcriptional regulatory protein SIN3 OS=*Saccharomyces cerevisiae* GN=SIN3 PE=1 SV=2  
H2B2\_YEAST Histone H2B.2 OS=*Saccharomyces cerevisiae* GN=H2B2 PE=1 SV=2  
UME1\_YEAST Transcriptional regulatory protein UME1 OS=*Saccharomyces cerevisiae* GN=UME1 PE=1 SV=1  
POB3\_YEAST FACT complex subunit POB3 OS=*Saccharomyces cerevisiae* GN=POB3 PE=1 SV=1  
RSC6\_YEAST Chromatin structure-remodeling complex protein RSC6 OS=*Saccharomyces cerevisiae* GN=RSC6 PE=1  
RPA14\_YEAST DNA-directed RNA polymerase I subunit RPA14 OS=*Saccharomyces cerevisiae* GN=RPA14 PE=1 SV=1  
RSC7\_YEAST Chromatin structure-remodeling complex subunit RSC7 OS=*Saccharomyces cerevisiae* GN=NPL6 PE=1

#### Identified Proteins (metabolic, ribosomal, common contaminants)

PYRF\_YEAST Orotidine 5'-phosphate decarboxylase OS=*Saccharomyces cerevisiae* GN=URA3 PE=1 SV=2  
SCW4\_YEAST Probable family 17 glucosidase SCW4 OS=*Saccharomyces cerevisiae* GN=SCW4 PE=1 SV=1  
RAS2\_YEAST Ras-like protein 2 OS=*Saccharomyces cerevisiae* GN=RAS2 PE=1 SV=4  
PWP1\_YEAST Periodic tryptophan protein 1 OS=*Saccharomyces cerevisiae* GN=PWP1 PE=1 SV=1  
ERG19\_YEAST Diphosphomevalonate decarboxylase OS=*Saccharomyces cerevisiae* GN=ERG19 PE=1 SV=2  
KEL1\_YEAST Kelch repeat-containing protein 1 OS=*Saccharomyces cerevisiae* GN=KEL1 PE=1 SV=1  
BGL2\_YEAST Glucan 1,3-beta-glucosidase OS=*Saccharomyces cerevisiae* GN=BGL2 PE=1 SV=1  
SCW10\_YEAST Probable family 17 glucosidase SCW10 OS=*Saccharomyces cerevisiae* GN=SCW10 PE=1 SV=1  
FKBP2\_YEAST FK506-binding protein 2 OS=*Saccharomyces cerevisiae* GN=FKB2 PE=1 SV=1  
YKH7\_YEAST Uncharacterized protein YKL077W OS=*Saccharomyces cerevisiae* GN=YKL077W PE=1 SV=1  
BRX1\_YEAST Ribosome biogenesis protein BRX1 OS=*Saccharomyces cerevisiae* GN=BRX1 PE=1 SV=1  
PAL1\_YEAST Uncharacterized protein YDR348C OS=*Saccharomyces cerevisiae* GN=YDR348C PE=1 SV=1  
KPR1\_YEAST Ribose-phosphate pyrophosphokinase 1 OS=*Saccharomyces cerevisiae* GN=PRS1 PE=1 SV=1  
YM11\_YEAST Uncharacterized protein YMR124W OS=*Saccharomyces cerevisiae* GN=YMR124W PE=1 SV=2  
PRS7\_YEAST 26S protease regulatory subunit 7 homolog OS=*Saccharomyces cerevisiae* GN=RPT1 PE=1 SV=1  
RRP9\_YEAST Ribosomal RNA-processing protein 9 OS=*Saccharomyces cerevisiae* GN=RRP9 PE=1 SV=1  
CIC1\_YEAST Proteasome-interacting protein CIC1 OS=*Saccharomyces cerevisiae* GN=CIC1 PE=1 SV=1  
MPM1\_YEAST Mitochondrial peculiar membrane protein 1 OS=*Saccharomyces cerevisiae* GN=MPM1 PE=1 SV=1  
IDI1\_YEAST Isopentenyl-diphosphate Delta-isomerase OS=*Saccharomyces cerevisiae* GN=IDI1 PE=1 SV=2  
PEX14\_YEAST Peroxisomal membrane protein PEX14 OS=*Saccharomyces cerevisiae* GN=PEX14 PE=1 SV=1  
YER0\_YEAST Uncharacterized protein YER080W OS=*Saccharomyces cerevisiae* GN=YER080W PE=1 SV=1  
RT23\_YEAST 37S ribosomal protein S23, mitochondrial OS=*Saccharomyces cerevisiae* GN=RSM23 PE=1 SV=2  
BUD21\_YEAST Bud site selection protein 21 OS=*Saccharomyces cerevisiae* GN=BUD21 PE=1 SV=1  
ELOC\_YEAST Elongin-C OS=*Saccharomyces cerevisiae* GN=ELC1 PE=1 SV=1  
CDC11\_YEAST Cell division control protein 11 OS=*Saccharomyces cerevisiae* GN=CDC11 PE=1 SV=1  
RFC2\_YEAST Replication factor C subunit 2 OS=*Saccharomyces cerevisiae* GN=RFC2 PE=1 SV=1  
EFTU\_YEAST Elongation factor Tu, mitochondrial OS=*Saccharomyces cerevisiae* GN=TUF1 PE=1 SV=1  
PPN1\_YEAST Endopolyphosphatase OS=*Saccharomyces cerevisiae* GN=PPN1 PE=1 SV=1  
ETFA\_YEAST Probable electron transfer flavoprotein subunit alpha, mitochondrial OS=*Saccharomyces cerevisiae* GN=ETFA PE=1 SV=1

GBG\_YEAST Guanine nucleotide-binding protein subunit gamma OS=Saccharomyces cerevisiae GN=STE18 PE=1 SV  
PUR4\_YEAST Phosphoribosylformylglycinamide synthase OS=Saccharomyces cerevisiae GN=ADE6 PE=1 SV=2  
SUCB\_YEAST Succinyl-CoA ligase [ADP-forming] subunit beta, mitochondrial OS=Saccharomyces cerevisiae GN=LSC  
UTP15\_YEAST U3 small nucleolar RNA-associated protein 15 OS=Saccharomyces cerevisiae GN=UTP15 PE=1 SV=1  
SEC3\_YEAST Exocyst complex component SEC3 OS=Saccharomyces cerevisiae GN=SEC3 PE=1 SV=1  
AML1\_YEAST N(6)-adenine-specific DNA methyltransferase-like 1 OS=Saccharomyces cerevisiae GN=AML1 PE=1 SV  
RM10\_YEAST 54S ribosomal protein L10, mitochondrial OS=Saccharomyces cerevisiae GN=MRPL10 PE=1 SV=2  
UCRI\_YEAST Cytochrome b-c1 complex subunit Rieske, mitochondrial OS=Saccharomyces cerevisiae GN=RIP1 PE=1  
KHSE\_YEAST Homoserine kinase OS=Saccharomyces cerevisiae GN=THR1 PE=1 SV=4  
SMD1\_YEAST Small nuclear ribonucleoprotein Sm D1 OS=Saccharomyces cerevisiae GN=SMD1 PE=1 SV=1  
CYC1\_YEAST Cytochrome c iso-1 OS=Saccharomyces cerevisiae GN=CYC1 PE=1 SV=2  
PET10\_YEAST Protein PET10 OS=Saccharomyces cerevisiae GN=PET10 PE=1 SV=3  
RT35\_YEAST 37S ribosomal protein S35, mitochondrial OS=Saccharomyces cerevisiae GN=MRPS35 PE=1 SV=1  
PROF\_YEAST Profilin OS=Saccharomyces cerevisiae GN=PFY1 PE=1 SV=2  
NOP13\_YEAST Nucleolar protein 13 OS=Saccharomyces cerevisiae GN=NOP13 PE=1 SV=1  
RM27\_YEAST 54S ribosomal protein L27, mitochondrial OS=Saccharomyces cerevisiae GN=MRPL27 PE=1 SV=2  
YHA8\_YEAST Uncharacterized transporter YHL008C OS=Saccharomyces cerevisiae GN=YHL008C PE=1 SV=1  
DYL1\_YEAST Dynein light chain 1, cytoplasmic OS=Saccharomyces cerevisiae GN=DYN2 PE=1 SV=1  
CDC73\_YEAST Cell division control protein 73 OS=Saccharomyces cerevisiae GN=CDC73 PE=1 SV=1  
HRB1\_YEAST Protein HRB1 OS=Saccharomyces cerevisiae GN=HRB1 PE=1 SV=2  
SNZ1\_YEAST Pyridoxine biosynthesis protein SNZ1 OS=Saccharomyces cerevisiae GN=SNZ1 PE=1 SV=1  
RS9A\_YEAST 40S ribosomal protein S9-A OS=Saccharomyces cerevisiae GN=RPS9A PE=1 SV=3  
ARPC2\_YEAST Actin-related protein 2/3 complex subunit 2 OS=Saccharomyces cerevisiae GN=ARC35 PE=1 SV=1  
TRS31\_YEAST Transport protein particle 31 kDa subunit OS=Saccharomyces cerevisiae GN=TRS31 PE=1 SV=1  
PUT2\_YEAST Delta-1-pyrroline-5-carboxylate dehydrogenase, mitochondrial OS=Saccharomyces cerevisiae GN=PU  
RM51\_YEAST 54S ribosomal protein L51, mitochondrial OS=Saccharomyces cerevisiae GN=MRPL51 PE=1 SV=1  
LGUL\_YEAST Lactoylglutathione lyase OS=Saccharomyces cerevisiae GN=GLO1 PE=1 SV=1  
HIS8\_YEAST Histidinol-phosphate aminotransferase OS=Saccharomyces cerevisiae GN=HIS5 PE=1 SV=2  
NPT1\_YEAST Nicotinate phosphoribosyltransferase OS=Saccharomyces cerevisiae GN=NPT1 PE=1 SV=3  
METK2\_YEAST S-adenosylmethionine synthase 2 OS=Saccharomyces cerevisiae GN=SAM2 PE=1 SV=3  
FMP10\_YEAST Uncharacterized mitochondrial membrane protein FMP10 OS=Saccharomyces cerevisiae GN=FMP1  
YPT31\_YEAST GTP-binding protein YPT31/YPT8 OS=Saccharomyces cerevisiae GN=YPT31 PE=1 SV=3  
YMX6\_YEAST Uncharacterized protein YMR086W OS=Saccharomyces cerevisiae GN=YMR086W PE=1 SV=1  
ACPM\_YEAST Acyl carrier protein, mitochondrial OS=Saccharomyces cerevisiae GN=ACP1 PE=1 SV=1  
RM33\_YEAST 54S ribosomal protein L33, mitochondrial OS=Saccharomyces cerevisiae GN=MRPL33 PE=1 SV=4  
RL14A\_YEAST 60S ribosomal protein L14-A OS=Saccharomyces cerevisiae GN=RPL14A PE=1 SV=1  
PBP1\_YEAST PAB1-binding protein 1 OS=Saccharomyces cerevisiae GN=PBP1 PE=1 SV=1  
GPDM\_YEAST Glycerol-3-phosphate dehydrogenase, mitochondrial OS=Saccharomyces cerevisiae GN=GUT2 PE=1  
RIB1\_YEAST GTP cyclohydrolase-2 OS=Saccharomyces cerevisiae GN=RIB1 PE=1 SV=2  
OTC\_YEAST Ornithine carbamoyltransferase OS=Saccharomyces cerevisiae GN=ARG3 PE=1 SV=1  
UBP6\_YEAST Ubiquitin carboxyl-terminal hydrolase 6 OS=Saccharomyces cerevisiae GN=UBP6 PE=1 SV=1  
SUR7\_YEAST Protein SUR7 OS=Saccharomyces cerevisiae GN=SUR7 PE=1 SV=1  
TWF1\_YEAST Twinfilin-1 OS=Saccharomyces cerevisiae GN=TWF1 PE=1 SV=1  
RN49\_YEAST 54S ribosomal protein L49, mitochondrial OS=Saccharomyces cerevisiae GN=MRPL49 PE=1 SV=2  
RSM28\_YEAST 37S ribosomal protein RSM28, mitochondrial OS=Saccharomyces cerevisiae GN=RSM28 PE=1 SV=2

edia. 1832 protiens were identified and those

is). Enrichment was calculated by normalized NSAF as detailed in Byrum et al., 2013.

(74 proteins) in affinity purifications (Byrum et al., 2013).

| Gene symbol | Accession Numb | MW      | gRNA/No gRNA<br>(Fold Change) |
|-------------|----------------|---------|-------------------------------|
| REB1        | P21538         | 92 kDa  | 8.1                           |
| SPT5        | P27692         | 116 kDa | 5.4                           |
| TOA2        | P32774         | 13 kDa  | 5.1                           |
| BAF1        | P14164         | 82 kDa  | 4.7                           |
| SIN3        | P22579         | 175 kDa | 4.2                           |
| H2B2        | P02294         | 14 kDa  | 4.1                           |
| UME1        | Q03010         | 51 kDa  | 3.2                           |
| POB3        | Q04636         | 63 kDa  | 3                             |
| RSC6        | P25632         | 54 kDa  | 2.8                           |
| RPA14       | P50106         | 15 kDa  | 2.4                           |
| RSC7        | P32832         | 50 kDa  | 2.1                           |
|             |                |         |                               |
| PYRF        | P03962         | 29 kDa  | 15                            |
| SCW4        | P53334         | 40 kDa  | 15                            |
| RAS2        | P01120         | 35 kDa  | 12                            |
| PWP1        | P21304         | 64 kDa  | 11                            |
| ERG19       | P32377         | 44 kDa  | 9.6                           |
| KEL1        | P38853         | 131 kDa | 9.6                           |
| BGL2        | P15703         | 34 kDa  | 9.3                           |
| SCW10       | Q04951         | 40 kDa  | 7.2                           |
| FKBP2       | P32472         | 14 kDa  | 6                             |
| YKH7        | P36081         | 46 kDa  | 6                             |
| BRX1        | Q08235         | 34 kDa  | 5.8                           |
| PAL1        | Q05518         | 55 kDa  | 5.8                           |
| KPR1        | P32895         | 47 kDa  | 5                             |
| YM11        | P39523         | 106 kDa | 5                             |
| PRS7        | P33299         | 52 kDa  | 5                             |
| RRP9        | Q06506         | 65 kDa  | 5                             |
| CIC1        | P38779         | 43 kDa  | 4.7                           |
| MPM1        | P40364         | 28 kDa  | 4                             |
| IDI1        | P15496         | 33 kDa  | 3.9                           |
| PEX14       | P53112         | 38 kDa  | 3.6                           |
| YER0        | P40053         | 72 kDa  | 3.5                           |
| RT23        | Q01163         | 56 kDa  | 3.3                           |
| BUD21       | Q08492         | 24 kDa  | 3.2                           |
| ELOC        | Q03071         | 11 kDa  | 3.2                           |
| CDC11       | P32458         | 48 kDa  | 3.1                           |
| RFC2        | P40348         | 40 kDa  | 3.1                           |
| EFTU        | P02992         | 48 kDa  | 3                             |
| PPN1        | Q04119         | 78 kDa  | 3                             |
| ETFA        | Q12480         | 37 kDa  | 3                             |

|       |             |         |     |
|-------|-------------|---------|-----|
| GBG   | P18852      | 13 kDa  | 3   |
| PUR4  | P38972      | 149 kDa | 3   |
| SUCB  | P53312      | 47 kDa  | 2.9 |
| UTP15 | Q04305      | 58 kDa  | 2.9 |
| SEC3  | P33332      | 155 kDa | 2.9 |
| AML1  | P53200      | 29 kDa  | 2.9 |
| RM10  | P36520      | 36 kDa  | 2.9 |
| UCRI  | P08067      | 23 kDa  | 2.8 |
| KHSE  | P17423      | 39 kDa  | 2.8 |
| SMD1  | Q02260      | 16 kDa  | 2.8 |
| CYC1  | P00044      | 12 kDa  | 2.6 |
| PET10 | P36139      | 31 kDa  | 2.6 |
| RT35  | P53292      | 40 kDa  | 2.6 |
| PROF  | P07274      | 14 kDa  | 2.6 |
| NOP13 | P53883      | 46 kDa  | 2.6 |
| RM27  | P36526      | 16 kDa  | 2.6 |
| YHA8  | P38750      | 70 kDa  | 2.6 |
| DYL1  | Q02647      | 10 kDa  | 2.5 |
| CDC73 | Q06697      | 44 kDa  | 2.5 |
| HRB1  | P38922      | 52 kDa  | 2.5 |
| SNZ1  | Q03148      | 32 kDa  | 2.5 |
| RS9A  | O13516      | 22 kDa  | 2.4 |
| ARPC2 | P53731      | 40 kDa  | 2.4 |
| TRS31 | Q03337      | 32 kDa  | 2.4 |
| PUT2  | P07275      | 64 kDa  | 2.4 |
| RM51  | Q06090      | 16 kDa  | 2.4 |
| LGUL  | P50107      | 37 kDa  | 2.4 |
| HIS8  | P07172      | 43 kDa  | 2.3 |
| NPT1  | P39683      | 49 kDa  | 2.3 |
| METK2 | P19358      | 42 kDa  | 2.2 |
| FMP10 | P40098      | 28 kDa  | 2.2 |
| YPT31 | P38555 (+1) | 24 kDa  | 2.2 |
| YMX6  | Q04279      | 106 kDa | 2.2 |
| ACPM  | P32463      | 14 kDa  | 2.2 |
| RM33  | P20084      | 10 kDa  | 2.2 |
| RL14A | P36105      | 15 kDa  | 2.1 |
| PBP1  | P53297      | 79 kDa  | 2.1 |
| GPDM  | P32191      | 72 kDa  | 2.1 |
| RIB1  | P38066      | 38 kDa  | 2.1 |
| OTC   | P05150      | 38 kDa  | 2.1 |
| UBP6  | P43593      | 57 kDa  | 2.1 |
| SUR7  | P54003      | 34 kDa  | 2.1 |
| TWF1  | P53250      | 37 kDa  | 2.1 |
| RN49  | P40858      | 18 kDa  | 2.1 |
| RSM28 | Q03430      | 41 kDa  | 2.1 |

| Identified F | Gene Symb | Accession # | MW      | Spectral counts |         | Normalized NSAF values |            |
|--------------|-----------|-------------|---------|-----------------|---------|------------------------|------------|
|              |           |             |         | gRNA            | No gRNA | gRNA                   | No gRNA    |
| PYRF_YEAS    | PYRF      | P03962      | 29 kDa  | 657             | 45      | 2.3034                 | 0.15574    |
| SCW4_YEA     | SCW4      | P53334      | 40 kDa  | 43              | 3       | 0.11355                | 0.0076196  |
| RAS2_YEAS    | RAS2      | P01120      | 35 kDa  | 10              | 1       | 0.030093               | 0.0025358  |
| PWP1_YEA     | PWP1      | P21304      | 64 kDa  | 10              | 1       | 0.02054                | 0.0019358  |
| ERG19_YEA    | ERG19     | P32377      | 44 kDa  | 9               | 1       | 0.022174               | 0.0023133  |
| KEL1_YEAS    | KEL1      | P38853      | 131 kDa | 6               | 1       | 0.0054931              | 0.00057277 |
| BGL2_YEAS    | BGL2      | P15703      | 34 kDa  | 78              | 10      | 0.23854                | 0.02567    |
| REB1_YEAS    | REB1      | P21538      | 92 kDa  | 5               | 1       | 0.0067677              | 0.00083919 |
| SCW10_YEA    | SCW10     | Q04951      | 40 kDa  | 24              | 3       | 0.067308               | 0.0093606  |
| FKBP2_YEA    | FKBP2     | P32472      | 14 kDa  | 5               | 1       | 0.028788               | 0.0047652  |
| YKH7_YEAS    | YKH7      | P36081      | 46 kDa  | 5               | 1       | 0.010224               | 0.0017008  |
| BRX1_YEAS    | BRX1      | Q08235      | 34 kDa  | 10              | 2       | 0.032329               | 0.0055678  |
| PAL1_YEAS    | PAL1      | Q05518      | 55 kDa  | 5               | 1       | 0.010082               | 0.0017505  |
| SPT5_YEAS    | SPT5      | P27692      | 116 kDa | 5               | 1       | 0.0056711              | 0.001046   |
| TOA2_YEAS    | TOA2      | P32774      | 13 kDa  | 5               | 1       | 0.026691               | 0.005273   |
| KPR1_YEAS    | KPR1      | P32895      | 47 kDa  | 8               | 2       | 0.020962               | 0.004191   |
| YM11_YEA     | YM11      | P39523      | 106 kDa | 6               | 2       | 0.0070735              | 0.001414   |
| PRS7_YEAS    | PRS7      | P33299      | 52 kDa  | 5               | 1       | 0.011132               | 0.0022086  |
| RRP9_YEAS    | RRP9      | Q06506      | 65 kDa  | 5               | 1       | 0.01006                | 0.0020314  |
| CIC1_YEAS    | CIC1      | P38779      | 43 kDa  | 6               | 1       | 0.014793               | 0.0031713  |
| BAF1_YEAS    | BAF1      | P14164      | 82 kDa  | 5               | 1       | 0.0072098              | 0.0015254  |
| SIN3_YEAS    | SIN3      | P22579      | 175 kDa | 5               | 1       | 0.0037565              | 0.00088897 |
| H2B2_YEAS    | H2B2      | P02294      | 14 kDa  | 81              | 87      | 0.021748               | 0.0053125  |
| MPM1_YEA     | MPM1      | P40364      | 28 kDa  | 10              | 3       | 0.03595                | 0.0090786  |
| IDI1_YEAS    | IDI1      | P15496      | 33 kDa  | 18              | 5       | 0.054499               | 0.014115   |
| PEX14_YEA    | PEX14     | P53112      | 38 kDa  | 11              | 3       | 0.032705               | 0.0090831  |
| YER0_YEAS    | YER0      | P40053      | 72 kDa  | 11              | 3       | 0.018477               | 0.0052646  |
| RT23_YEAS    | RT23      | Q01163      | 56 kDa  | 5               | 2       | 0.010978               | 0.0033269  |
| BUD21_YEA    | BUD21     | Q08492      | 24 kDa  | 6               | 2       | 0.023279               | 0.0073049  |
| UME1_YEA     | UME1      | Q03010      | 51 kDa  | 6               | 2       | 0.014875               | 0.0046531  |
| ELOC_YEAS    | ELOC      | Q03071      | 11 kDa  | 5               | 2       | 0.041449               | 0.012996   |
| CDC11_YEA    | CDC11     | P32458      | 48 kDa  | 12              | 4       | 0.033015               | 0.010509   |
| RFC2_YEAS    | RFC2      | P40348      | 40 kDa  | 6               | 2       | 0.014126               | 0.0046262  |
| EFTU_YEAS    | EFTU      | P02992      | 48 kDa  | 40              | 14      | 0.095198               | 0.0321     |
| PPN1_YEAS    | PPN1      | Q04119      | 78 kDa  | 14              | 5       | 0.017319               | 0.0058652  |
| POB3_YEAS    | POB3      | Q04636      | 63 kDa  | 12              | 4       | 0.024482               | 0.0082034  |
| ETFA_YEAS    | ETFA      | Q12480      | 37 kDa  | 11              | 4       | 0.027632               | 0.009349   |
| GBG_YEAS     | GBG       | P18852      | 13 kDa  | 5               | 2       | 0.035393               | 0.011696   |
| PUR4_YEAS    | PUR4      | P38972      | 149 kDa | 5               | 2       | 0.0042212              | 0.0014279  |
| SUCB_YEAS    | SUCB      | P53312      | 47 kDa  | 27              | 10      | 0.059446               | 0.020597   |
| UTP15_YEA    | UTP15     | Q04305      | 58 kDa  | 8               | 3       | 0.01818                | 0.0063459  |
| SEC3_YEAS    | SEC3      | P33332      | 155 kDa | 7               | 3       | 0.0060227              | 0.0020559  |
| AML1_YEA     | AML1      | P53200      | 29 kDa  | 5               | 2       | 0.017364               | 0.006086   |
| RM10_YEA     | RM10      | P36520      | 36 kDa  | 5               | 2       | 0.013874               | 0.0047367  |
| UCRI_YEAS    | UCRI      | P08067      | 23 kDa  | 18              | 7       | 0.068993               | 0.024609   |
| KHSE_YEAS    | KHSE      | P17423      | 39 kDa  | 9               | 3       | 0.019995               | 0.0071271  |
| SMD1_YEA     | SMD1      | Q02260      | 16 kDa  | 8               | 3       | 0.040301               | 0.0143     |

|            |       |            |         |     |     |           |           |
|------------|-------|------------|---------|-----|-----|-----------|-----------|
| RSC6_YEAS' | RSC6  | P25632     | 54 kDa  | 7   | 3   | 0.015875  | 0.00569   |
| CYC1_YEAS' | CYC1  | P00044     | 12 kDa  | 117 | 68  | 0.61144   | 0.2352    |
| PET10_YEA  | PET10 | P36139     | 31 kDa  | 17  | 7   | 0.048927  | 0.019041  |
| RT35_YEAS' | RT35  | P53292     | 40 kDa  | 12  | 5   | 0.031711  | 0.011999  |
| PROF_YEAS  | PROF  | P07274     | 14 kDa  | 11  | 4   | 0.058874  | 0.023044  |
| NOP13_YE/  | NOP13 | P53883     | 46 kDa  | 6   | 3   | 0.017094  | 0.0065024 |
| RM27_YEA'  | RM27  | P36526     | 16 kDa  | 5   | 2   | 0.024505  | 0.0095335 |
| YHA8_YEAS  | YHA8  | P38750     | 70 kDa  | 5   | 2   | 0.009366  | 0.0036348 |
| DYL1_YEAS' | DYL1  | Q02647     | 10 kDa  | 10  | 4   | 0.073508  | 0.029371  |
| CDC73_YEA  | CDC73 | Q06697     | 44 kDa  | 9   | 4   | 0.018285  | 0.0073158 |
| HRB1_YEAS  | HRB1  | P38922     | 52 kDa  | 9   | 4   | 0.020922  | 0.0084023 |
| SNZ1_YEAS  | SNZ1  | Q03148     | 32 kDa  | 5   | 3   | 0.006198  | 0.0025142 |
| RS9A_YEAS  | RS9A  | O13516     | 22 kDa  | 151 | 156 | 0.0091554 | 0.0037905 |
| ARPC2_YEA  | ARPC2 | P53731     | 40 kDa  | 15  | 7   | 0.044768  | 0.018359  |
| TRS31_YEA' | TRS31 | Q03337     | 32 kDa  | 8   | 4   | 0.026095  | 0.010779  |
| RPA14_YEA  | RPA14 | P50106     | 15 kDa  | 7   | 3   | 0.036547  | 0.01524   |
| PUT2_YEAS  | PUT2  | P07275     | 64 kDa  | 6   | 3   | 0.012072  | 0.0051256 |
| RM51_YEA'  | RM51  | Q06090     | 16 kDa  | 6   | 3   | 0.035158  | 0.014913  |
| LGUL_YEAS  | LGUL  | P50107     | 37 kDa  | 5   | 2   | 0.012764  | 0.0053001 |
| HIS8_YEAS' | HIS8  | P07172     | 43 kDa  | 9   | 5   | 0.024457  | 0.010784  |
| NPT1_YEAS  | NPT1  | P39683     | 49 kDa  | 5   | 2   | 0.010476  | 0.0046279 |
| METK2_YE/  | METK2 | P19358     | 42 kDa  | 79  | 75  | 0.038801  | 0.017378  |
| FMP10_YE/  | FMP10 | P40098     | 28 kDa  | 14  | 8   | 0.055633  | 0.0252    |
| YPT31_YEA  | YPT31 | P38555 (+1 | 24 kDa  | 9   | 4   | 0.028763  | 0.012951  |
| YMX6_YEA'  | YMX6  | Q04279     | 106 kDa | 8   | 5   | 0.0073219 | 0.0033862 |
| ACPM_YEA'  | ACPM  | P32463     | 14 kDa  | 8   | 4   | 0.046487  | 0.021428  |
| RM33_YEA'  | RM33  | P20084     | 10 kDa  | 7   | 3   | 0.054493  | 0.024282  |
| RL14A_YEA  | RL14A | P36105     | 15 kDa  | 111 | 121 | 0.010356  | 0.0050431 |
| PBP1_YEAS  | PBP1  | P53297     | 79 kDa  | 32  | 16  | 0.050084  | 0.024091  |
| GPDM_YEA   | GPDM  | P32191     | 72 kDa  | 17  | 8   | 0.026484  | 0.012419  |
| RIB1_YEAS' | RIB1  | P38066     | 38 kDa  | 16  | 9   | 0.043642  | 0.020754  |
| RSC7_YEAS' | RSC7  | P32832     | 50 kDa  | 13  | 7   | 0.029347  | 0.014198  |
| OTC_YEAST  | OTC   | P05150     | 38 kDa  | 13  | 6   | 0.031697  | 0.015373  |
| UBP6_YEAS  | UBP6  | P43593     | 57 kDa  | 9   | 5   | 0.019729  | 0.0094804 |
| SUR7_YEAS  | SUR7  | P54003     | 34 kDa  | 8   | 4   | 0.021538  | 0.010088  |
| TWF1_YEA'  | TWF1  | P53250     | 37 kDa  | 8   | 4   | 0.020141  | 0.0093864 |
| RN49_YEAS  | RN49  | P40858     | 18 kDa  | 6   | 3   | 0.026689  | 0.012968  |
| RSM28_YE/  | RSM28 | Q03430     | 41 kDa  | 6   | 3   | 0.014043  | 0.0067459 |

**gRNA/No gRNA  
(Fold Change)**

15  
15  
12  
11  
9.6  
9.6  
9.3  
8.1  
7.2  
6  
6  
5.8  
5.8  
5.4  
5.1  
5  
5  
5  
5  
4.7  
4.7  
4.2  
4.1  
4  
3.9  
3.6  
3.5  
3.3  
3.2  
3.2  
3.2  
3.1  
3.1  
3  
3  
3  
3  
3  
3  
2.9  
2.9  
2.9  
2.9  
2.9  
2.8  
2.8  
2.8





Table S2. Spectral counts (>2) for PTM-containing histone peptides isolated with GAL1 promoter chromatin

|            | <b>Sequence</b>       | <b>Modification</b> | No gRNA | Cas9/gRNA |
|------------|-----------------------|---------------------|---------|-----------|
| Histone H4 | (K)GLGkGGAKR(H)       | H4K12acK16ac        | 7       | 3         |
| Histone H3 | (R)kSTGGkAPR(K)       | H3K9acK14ac         | 7       | 7         |
|            | (R)kQLASKaAR(K)       | H3K18acK23ac        | 5       | 6         |
|            | (R)KSTGGkAPR(K)       | H3K14ac             | 12      | 17        |
|            | (R)KQLASKaAR(K)       | H3K23ac             | 10      | 13        |
|            | (R)KSAPSTGGVK(K)      | H3K27ac             | 5       | 4         |
|            | (R)RFQkSTELLIR(K)     | H3K56ac             | 11      | 5         |
|            | (R)EIAQDFkTDLR(F)     | H3K79me             | 5       | 4         |
|            | (R)EIAQDFkTDLR(F)     | H3K79me2            | 7       | 3         |
| H2B        | (K)AEkKPASKAPAek(K)   | H2BK6acK11ac        | 5       | 4         |
|            | (K)KPASKAPAekKPAek(K) | H2BK11acK16ac       | 9       | 4         |
|            | (K)AEkKPASK(A)        | H2BK6ac             | 7       | 3         |

in using CRISPR-ChAP-MS.

Fold Change =gRNA/No gRNA

0.4285714

1

1.2

1.4166667

1.3

0.8

0.4545455

0.8

0.4285714

0.8

0.4444444

0.4285714
